# Supplementary material for: Activation of the Renin–Angiotensin–Aldosterone System Is Attenuated in Hypertensive Compared with Normotensive Pregnancy
Source: MDPI journal article supplement (doi:10.3390/ijms241612728), 2023-08-12
Supplement: s1 [file s1]

| RAAS Component                                                                                                 | Gestational hypertension<br>N=21               | Pre-eclampsia<br>N=6                          | P value@       |
|----------------------------------------------------------------------------------------------------------------|------------------------------------------------|-----------------------------------------------|----------------|
| Ang I, pmol/L<br>1 <sup>st</sup> Trimester<br>3 <sup>rd</sup> Trimester                                        | 75.5 (40.9 – 102.4)<br>81.9 (55.6 – 145.1)*    | 52.4 (3.4 – 506.1)<br>55.4 (4.7 – 273.5)      | 0.747<br>0.345 |
| Ang II, pmol/L<br>1 <sup>st</sup> Trimester<br>3 <sup>rd</sup> Trimester                                       | 143.9 (94.0 – 192.9)<br>150.1 (88.8 – 244.5)   | 122.5 (17.8 – 1077.0)<br>120.0 (16.5 – 696.4) | 0.887<br>0.441 |
| Ang III, pmol/L<br>1 <sup>st</sup> Trimester<br>3 <sup>rd</sup> Trimester                                      | 2.0 (2.0 – 7.3)<br>2.0 (2.0 – 4.9)             | 3.2 (2.0 – 42.7)<br>2.6 (2.0 – 11.5)          | 0.842<br>0.988 |
| Ang IV, pmol/L<br>1 <sup>st</sup> Trimester<br>3 <sup>rd</sup> Trimester                                       | 5.3 (3.8 – 9.5)<br>8.0 (4.9 – 11.9)            | 7.9 (1.0 – 76.2)<br>5.8 (3.5 – 21.2)          | 0.875<br>0.811 |
| Ang-1-5, pmol/L<br>1 <sup>st</sup> Trimester<br>3 <sup>rd</sup> Trimester                                      | 4.2 (3.0 – 7.3)<br>4.8 (3.7 – 7.9)             | 6.9 (1.0 – 36.5)<br>6.9 (1.0 – 28.1)          | 0.369<br>0.449 |
| Aldosterone, pmol/L<br>1 <sup>st</sup> Trimester<br>3 <sup>rd</sup> Trimester                                  | 269.6 (181.3 – 791.0)<br>492.5 (264.1 – 826.9) | 351.0 (9.7 – 839.7)<br>440.2 (118.4 – 1103.0) | 0.843<br>0.798 |
| PRA-S, pmol/L<br>1 <sup>st</sup> Trimester<br>3 <sup>rd</sup> Trimester                                        | 194.3 (130.0 – 277.9)<br>232.0 (145.2 – 343.2) | 174.8 (21.2 – 1583.0)<br>175.3 (21.2 – 969.9) | 0.887<br>0.408 |
| ACE-S, pmol/L / pmol/L<br>1 <sup>st</sup> Trimester<br>3 <sup>rd</sup> Trimester                               | 2.30 (1.67 – 3.21)<br>1.58 (1.45 – 2.19)**     | 2.24 (1.79 – 5.27)<br>2.19 (0.99 – 3.47)      | 0.798<br>0.339 |
| Aldosterone-Ang II ratio<br>(AA2-R), pmol/L / pmol/L<br>1 <sup>st</sup> Trimester<br>3 <sup>rd</sup> Trimester | 2.48 (1.13 – 4.67)<br>3.38 (2.04 – 6.12)       | 1.72 (0.55 – 5.17)<br>3.42 (1.10 – 9.65)      | 0.345<br>0.974 |

**Supplementary Table S1.** Serum concentrations of angiotensin (Ang) peptides, aldosterone, and the biomarkers PRA-S, ACE-S, and AA2-R at equilibrium determined by liquid chromatography with tandem mass spectrometry (LC-MS/MS) in the first and third trimesters of pregnancy in women that developed gestational hypertension or pre-eclampsia in pregnancy. Data are median and interquartile range (IQR). @, Gestational hypertension versus pre-eclampsia within trimester, analyzed by Mann-Whitney test. \*, P<0.05, and \*\*, P<0.01 for third trimester vs first trimester within group analyzed by Wilcoxon signed rank test. Abbreviations: PRA-S: surrogate biomarker for plasma renin activity, calculated from ([Ang I] + [Ang II]); ACE-S: surrogate biomarker for ACE activity, calculated from ([Ang II] / [Ang I]).
